# Supplementary material for: In situ synthesized 3D heterometallic metal–organic framework (MOF) as a high-energy-density material shows high heat of detonation, good thermostability and insensitivity
Source: Royal Society of Chemistry journal article supplement (doi:10.1039/c4dt03131h), 2014-12-06
Supplement: c4dt03131h1.pdf [file c4dt03131h1.pdf]

## Supplementary Information

### **In-Situ Synthesized 3D Heterometallic Metal-Organic Framework (MOF) as High-Energy-Density Materials Shows High Heat of denotation, Good Thermostability and Insensitivity**

#### **Table of Contents:**

- 1. FTIR spectra**
- 2. ICP-AES**
- 3. Heat of detonation**

**Table S1** Elemental Analyses by ICP-AES Method.

**Table S2** Crystal data and structure refinement for **1**.

**Table S3** Selected bond lengths (Å) and bond angles (°) for **1**.

**Table S4** Calculated parameters used in the detonation reactions.

**Fig. S1** FTIR spectra of **1** (red) and **1a** (blue).

**Fig. S2** <sup>1</sup>H NMR of **1**.

**\*Corresponding author**

**Prof. Sanping Chen**

**Tel.: +8602988302604**

**Fax: +8602988302604**

**E-mail: [sanpingchen@126.com](mailto:sanpingchen@126.com)**

**Table S1** Elemental Analyses by ICP-AES Method

|                     | Expt. ( $\omega$ / %) | RSD (%) | Calc. ( $\omega$ / %) |
|---------------------|-----------------------|---------|-----------------------|
| Cu                  | 34.644                | 1.18    | 34.65                 |
| Na                  | 3.118                 | 0.93    | 3.13                  |
| molar ratio (Cu/Na) | 4 : 1                 |         | 3.978 : 1             |

**Table S2** Crystal data and structure refinement for **1**.

| <b>1</b>                                                    |                                                                    |
|-------------------------------------------------------------|--------------------------------------------------------------------|
| CCDC                                                        |                                                                    |
| empirical formula                                           | Cu <sub>4</sub> Na C <sub>12</sub> N <sub>21</sub> H <sub>18</sub> |
| formula weight                                              | 733.62                                                             |
| crystal system                                              | <i>Triclinic</i>                                                   |
| space group                                                 | <i>P</i> -1                                                        |
| Temperature (K)                                             | 296(2) K                                                           |
| <i>a</i> (Å)                                                | 8.7330(8)                                                          |
| <i>b</i> (Å)                                                | 8.9376(8)                                                          |
| <i>c</i> (Å)                                                | 16.4561(14)                                                        |
| <i>V</i> (Å <sup>3</sup> )                                  | 1233.48(19)                                                        |
| <i>D<sub>c</sub></i> (Mg/cm <sup>3</sup> )                  | 1.975                                                              |
| <i>Z</i>                                                    | 2                                                                  |
| <i>F</i> (000)                                              | 728                                                                |
| $\mu$ (mm <sup>-1</sup> )                                   | 3.469                                                              |
| no. of reflections collected                                | 6152                                                               |
| no. of unique reflections                                   | 4284                                                               |
| <i>R</i> (int)                                              | 0.0207                                                             |
| goodness of fit on <i>F</i> <sup>2</sup>                    | 1.077                                                              |
| <i>R</i> <sub>1</sub> [ <i>I</i> > 2 $\sigma$ ( <i>I</i> )] | 0.0379                                                             |
| <i>wR</i> <sub>2</sub> (all data)                           | 0.1150                                                             |

**Table S3** Selected bond lengths (Å) and bond angles (°) for **1**.

|               |          |                     |            |
|---------------|----------|---------------------|------------|
| N(20)-Cu(1)#1 | 2.097(4) | N(4)-Cu(3)-N(6)     | 96.70(15)  |
| Cu(1)-N(13)   | 2.003(4) | N(14)#2-Cu(3)-N(6)  | 102.83(14) |
| Cu(1)-N(8)    | 2.006(4) | N(21)#5-Cu(3)-N(6)  | 111.53(15) |
| Cu(1)-N(18)   | 2.096(4) | N(6)-N(7)-Cu(2)     | 127.8(3)   |
| Cu(1)-N(20)#1 | 2.097(4) | N(8)-N(7)-Cu(2)     | 123.2(3)   |
| Cu(2)-N(12)   | 2.011(4) | C(8)-N(12)-Cu(2)    | 131.9(3)   |
| Cu(2)-N(19)   | 2.052(4) | N(11)-N(12)-Cu(2)   | 122.3(3)   |
| Cu(2)-N(7)    | 2.061(4) | N(7)-N(6)-Cu(3)     | 127.5(3)   |
| Cu(2)-N(15)#2 | 2.115(4) | N(5)-N(6)-Cu(3)     | 119.5(3)   |
| Cu(4)-N(5)    | 2.005(4) | N(15)-N(14)-Cu(3)#6 | 126.5(3)   |
| Cu(4)-N(16)#3 | 2.019(4) | N(13)-N(14)-Cu(3)#6 | 123.9(3)   |
| Cu(4)-N(3)    | 2.077(4) | N(14)-N(15)-Cu(2)#6 | 128.2(3)   |
| Cu(4)-N(11)#4 | 2.088(4) | N(16)-N(15)-Cu(2)#6 | 121.0(3)   |
| Cu(3)-N(4)    | 2.016(4) | N(20)-N(18)-Cu(1)   | 126.1(3)   |
| Cu(3)-N(14)#2 | 2.079(4) | N(19)-N(18)-Cu(1)   | 123.8(3)   |
| Cu(3)-N(21)#5 | 2.103(4) | C(11)-N(19)-Cu(2)   | 131.8(3)   |
| Cu(3)-N(6)    | 2.147(4) | N(18)-N(19)-Cu(2)   | 121.0(3)   |
| N(14)-Cu(3)#6 | 2.079(4) | C(11)-N(21)-Cu(3)#5 | 129.7(3)   |
| N(15)-Cu(2)#6 | 2.115(4) | N(20)-N(21)-Cu(3)#5 | 120.7(3)   |
| N(21)-Cu(3)#5 | 2.103(4) | C(4)-N(5)-Cu(4)     | 129.2(3)   |
| N(11)-Cu(4)#7 | 2.088(4) | N(6)-N(5)-Cu(4)     | 121.8(3)   |
| N(16)-Cu(4)#8 | 2.019(4) | N(10)-N(11)-Cu(4)#7 | 125.9(3)   |
| N(10)-Na(1)#9 | 2.438(4) | N(12)-N(11)-Cu(4)#7 | 124.9(3)   |
| N(9)-Na(1)    | 2.519(5) | C(4)-N(8)-Cu(1)     | 130.0(3)   |
| N(2)-Na(1)#10 | 2.688(5) | N(7)-N(8)-Cu(1)     | 122.4(3)   |
| N(1)-Na(1)#3  | 2.454(5) | C(2)-N(4)-Cu(3)     | 133.7(4)   |
| N(17)-Na(1)   | 2.516(7) | N(3)-N(4)-Cu(3)     | 120.9(3)   |

|                       |            |                       |            |
|-----------------------|------------|-----------------------|------------|
| Na(1)-N(10)#9         | 2.438(4)   | C (6)-N(16)-Cu(4)#8   | 130.2(3)   |
| Na(1)-N(1)#8          | 2.454(5)   | N(15)-N(16)-Cu(4)#8   | 120.4(3)   |
| Na(1)-N(2)#10         | 2.688(5)   | C(6)-N(13)-Cu(1)      | 130.1(3)   |
| N(18)-N(20)-Cu(1)#1   | 123.9(3)   | N(14)-N(13)-Cu(1)     | 121.8(3)   |
| N(21)-N(20)-Cu(1)#1   | 124.9(3)   | N(2)-N(3)-Cu(4)       | 123.0(3)   |
| N(13)-Cu(1)-N(8)      | 130.48(17) | N(4)-N(3)-Cu(4)       | 126.4(3)   |
| N(13)-Cu(1)-N(18)     | 112.55(16) | N(11)-N(10)-Na(1)#9   | 121.0(3)   |
| N(8)-Cu(1)-N(18)      | 95.80(15)  | N(9)-N(10)-Na(1)#9    | 126.4(3)   |
| N(13)-Cu(1)-N(20)#1   | 95.01(16)  | C(8)-N(9)-Na(1)       | 123.9(3)   |
| N(8)-Cu(1)-N(20)#1    | 112.87(16) | N(10)-N(9)-Na(1)      | 126.5(3)   |
| N(18)-Cu(1)-N(20)#1   | 110.03(14) | N(3)-N(2)-Na(1)#10    | 101.0(3)   |
| N(12)-Cu(2)-N(19)     | 126.92(16) | N(1)-N(2)-Na(1)#10    | 116.4(3)   |
| N(12)-Cu(2)-N(7)      | 121.80(16) | C(2)-N(1)-Na(1)#3     | 139.4(4)   |
| N(19)-Cu(2)-N(7)      | 94.38(16)  | N(2)-N(1)-Na(1)#3     | 111.2(3)   |
| N(12)-Cu(2)-N(15)#2   | 96.39(15)  | C(10)-N(17)-Na(1)     | 166.0(7)   |
| N(19)-Cu(2)-N(15)#2   | 112.74(15) | N(10)#9-Na(1)-N(1)#8  | 117.03(18) |
| N(7)-Cu(2)-N(15)#2    | 103.22(14) | N(10)#9-Na(1)-N(17)   | 120.0(2)   |
| N(5)-Cu(4)-N(16)#3    | 132.69(16) | N(1)#8-Na(1)-N(17)    | 122.5(2)   |
| N(5)-Cu(4)-N(3)       | 99.61(16)  | N(10)#9-Na(1)-N(9)    | 96.45(15)  |
| N(16)#3-Cu(4)-N(3)    | 105.74(16) | N(1)#8-Na(1)-N(9)     | 85.93(18)  |
| N(5)-Cu(4)-N(11)#4    | 106.42(15) | N(17)-Na(1)-N(9)      | 94.5(2)    |
| N(16)#3-Cu(4)-N(11)#4 | 100.57(16) | N(10)#9-Na(1)-N(2)#10 | 96.03(15)  |
| N(3)-Cu(4)-N(11)#4    | 111.40(16) | N(1)#8-Na(1)-N(2)#10  | 86.86(16)  |
| N(4)-Cu(3)-N(14)#2    | 126.83(15) | N(17)-Na(1)-N(2)#10   | 80.7(2)    |
| N(4)-Cu(3)-N(21)#5    | 125.97(16) | N(9)-Na(1)-N(2)#10    | 167.40(16) |
| N(14)#2-Cu(3)-N(21)#5 | 91.45(16)  |                       |            |
| N(20)-Cu(1)#1         | 2.097(4)   | N(14)#2-Cu(3)-N(21)#5 | 91.45(16)  |
| Cu(1)-N(13)           | 2.003(4)   | N(4)-Cu(3)-N(6)       | 96.70(15)  |
| Cu(1)-N(8)            | 2.006(4)   | N(14)#2-Cu(3)-N(6)    | 102.83(14) |

---

|                     |          |                     |            |
|---------------------|----------|---------------------|------------|
| Cu(1)-N(18)         | 2.096(4) | N(21)#5-Cu(3)-N(6)  | 111.53(15) |
| Cu(1)-N(20)#1       | 2.097(4) | N(6)-N(7)-Cu(2)     | 127.8(3)   |
| Cu(2)-N(12)         | 2.011(4) | N(8)-N(7)-Cu(2)     | 123.2(3)   |
| Cu(2)-N(19)         | 2.052(4) | C(8)-N(12)-Cu(2)    | 131.9(3)   |
| Cu(2)-N(7)          | 2.061(4) | N(11)-N(12)-Cu(2)   | 122.3(3)   |
| Cu(2)-N(15)#2       | 2.115(4) | N(7)-N(6)-Cu(3)     | 127.5(3)   |
| Cu(4)-N(5)          | 2.005(4) | N(5)-N(6)-Cu(3)     | 119.5(3)   |
| Cu(4)-N(16)#3       | 2.019(4) | N(15)-N(14)-Cu(3)#6 | 126.5(3)   |
| Cu(4)-N(3)          | 2.077(4) | N(13)-N(14)-Cu(3)#6 | 123.9(3)   |
| Cu(4)-N(11)#4       | 2.088(4) | N(14)-N(15)-Cu(2)#6 | 128.2(3)   |
| Cu(3)-N(4)          | 2.016(4) | N(16)-N(15)-Cu(2)#6 | 121.0(3)   |
| Cu(3)-N(14)#2       | 2.079(4) | N(20)-N(18)-Cu(1)   | 126.1(3)   |
| Cu(3)-N(21)#5       | 2.103(4) | N(19)-N(18)-Cu(1)   | 123.8(3)   |
| Cu(3)-N(6)          | 2.147(4) | C(11)-N(19)-Cu(2)   | 131.8(3)   |
| N(14)-Cu(3)#6       | 2.079(4) | N(18)-N(19)-Cu(2)   | 121.0(3)   |
| N(15)-Cu(2)#6       | 2.115(4) | C(11)-N(21)-Cu(3)#5 | 129.7(3)   |
| N(21)-Cu(3)#5       | 2.103(4) | N(20)-N(21)-Cu(3)#5 | 120.7(3)   |
| N(11)-Cu(4)#7       | 2.088(4) | C(4)-N(5)-Cu(4)     | 129.2(3)   |
| N(16)-Cu(4)#8       | 2.019(4) | N(6)-N(5)-Cu(4)     | 121.8(3)   |
| N(10)-Na(1)#9       | 2.438(4) | N(10)-N(11)-Cu(4)#7 | 125.9(3)   |
| N(9)-Na(1)          | 2.519(5) | N(12)-N(11)-Cu(4)#7 | 124.9(3)   |
| N(2)-Na(1)#10       | 2.688(5) | C(4)-N(8)-Cu(1)     | 130.0(3)   |
| N(1)-Na(1)#3        | 2.454(5) | N(7)-N(8)-Cu(1)     | 122.4(3)   |
| N(17)-Na(1)         | 2.516(7) | N(3)-N(4)-Cu(3)     | 120.9(3)   |
| Na(1)-N(10)#9       | 2.438(4) | C(6)-N(16)-Cu(4)#8  | 130.2(3)   |
| Na(1)-N(1)#8        | 2.454(5) | N(15)-N(16)-Cu(4)#8 | 120.4(3)   |
| Na(1)-N(2)#10       | 2.688(5) | C(6)-N(13)-Cu(1)    | 130.1(3)   |
| N(18)-N(20)-Cu(1)#1 | 123.9(3) | N(14)-N(13)-Cu(1)   | 121.8(3)   |
| N(21)-N(20)-Cu(1)#1 | 124.9(3) | N(2)-N(3)-Cu(4)     | 123.0(3)   |

---

|                       |            |                       |            |
|-----------------------|------------|-----------------------|------------|
| N(13)-Cu(1)-N(8)      | 130.48(17) | N(4)-N(3)-Cu(4)       | 126.4(3)   |
| N(13)-Cu(1)-N(18)     | 112.55(16) | N(11)-N(10)-Na(1)#9   | 121.0(3)   |
| N(8)-Cu(1)-N(18)      | 95.80(15)  | N(9)-N(10)-Na(1)#9    | 126.4(3)   |
| N(13)-Cu(1)-N(20)#1   | 95.01(16)  | C(8)-N(9)-Na(1)       | 123.9(3)   |
| N(8)-Cu(1)-N(20)#1    | 112.87(16) | N(10)-N(9)-Na(1)      | 126.5(3)   |
| N(18)-Cu(1)-N(20)#1   | 110.03(14) | N(3)-N(2)-Na(1)#10    | 101.0(3)   |
| N(12)-Cu(2)-N(19)     | 126.92(16) | N(1)-N(2)-Na(1)#10    | 116.4(3)   |
| N(12)-Cu(2)-N(7)      | 121.80(16) | C(2)-N(1)-Na(1)#3     | 139.4(4)   |
| N(19)-Cu(2)-N(7)      | 94.38(16)  | N(2)-N(1)-Na(1)#3     | 111.2(3)   |
| N(12)-Cu(2)-N(15)#2   | 96.39(15)  | C(10)-N(17)-Na(1)     | 166.0(7)   |
| N(19)-Cu(2)-N(15)#2   | 112.74(15) | N(10)#9-Na(1)-N(1)#8  | 117.03(18) |
| N(7)-Cu(2)-N(15)#2    | 103.22(14) | N(10)#9-Na(1)-N(17)   | 120.0(2)   |
| N(5)-Cu(4)-N(16)#3    | 132.69(16) | N(1)#8-Na(1)-N(17)    | 122.5(2)   |
| N(5)-Cu(4)-N(3)       | 99.61(16)  | N(10)#9-Na(1)-N(9)    | 96.45(15)  |
| N(16)#3-Cu(4)-N(3)    | 105.74(16) | N(1)#8-Na(1)-N(9)     | 85.93(18)  |
| N(5)-Cu(4)-N(11)#4    | 106.42(15) | N(17)-Na(1)-N(9)      | 94.5(2)    |
| N(16)#3-Cu(4)-N(11)#4 | 100.57(16) | N(10)#9-Na(1)-N(2)#10 | 96.03(15)  |
| N(3)-Cu(4)-N(11)#4    | 111.40(16) | N(1)#8-Na(1)-N(2)#10  | 86.86(16)  |
| N(4)-Cu(3)-N(14)#2    | 126.83(15) | N(17)-Na(1)-N(2)#10   | 80.7(2)    |
| N(4)-Cu(3)-N(21)#5    | 125.97(16) | N(9)-Na(1)-N(2)#10    | 167.40(16) |
| C(2)-N(4)-Cu(3)       | 133.7(4)   |                       |            |

Symmetry transformations used to generate equivalent atoms:

#1  $-x+1, -y, -z$ ; #2  $x+1, y, z$ ; #3  $x+1, y-1, z$ ; #4  $x, y-1, z$ ; #5  $-x+2, -y, -z$ ; #6  $x-1, y, z$

#7  $x, y+1, z$ ; #8  $x-1, y+1, z$ ; #9  $-x+1, -y+1, -z+1$ ; #10  $-x+1, -y, -z+1$

## 1. FTIR spectra

The infrared spectra of compound **1** displays strong and sharp peaks at approximately  $2942\text{ cm}^{-1}$ , which represent the C-H(CH<sub>3</sub>) stretching vibrations. The peak at  $2251\text{ cm}^{-1}$  corresponds to the stretching vibrations of C≡N. Moreover, the characteristic absorption bands at approximately  $1622$

cm<sup>-1</sup> indicative of the presence of C=N stretching vibrations in corresponding metal compound. The peak at 1493 cm<sup>-1</sup> corresponds to the stretching vibrations of the C-C, and 1379 cm<sup>-1</sup> corresponding to the stretching vibrations of the C-N. Consequently, the infrared spectrum is found to be in good consistent with the structural features of the compound.

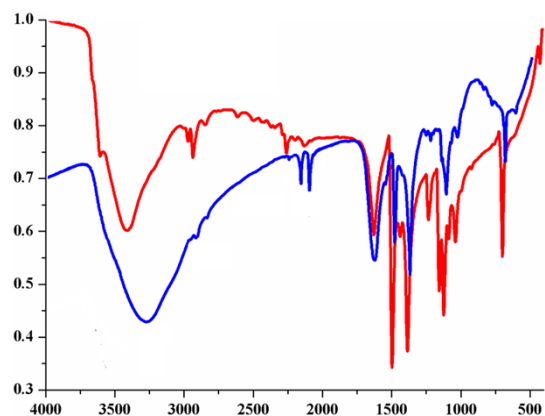

**Fig. S1** FTIR spectra of **1** (red) and **1a** (blue).

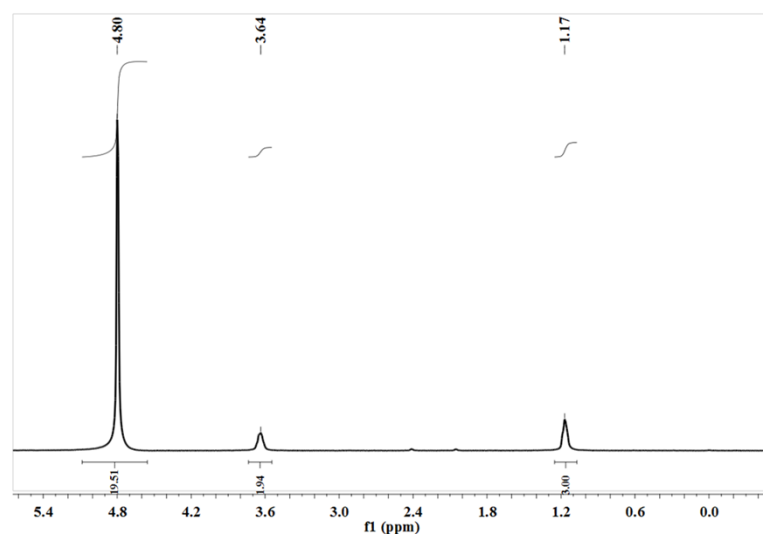

**Fig. S2** <sup>1</sup>H NMR of **1**.

## 2. ICP-AES

The content of Cu and Na for as-synthesized compound **1** were analyzed by inductively coupled plasma-atomic emission spectrometry (ICP-AES) on a J-A1100 (Jarrell-Ash, USA) ICP spectrometer. The experimental conditions are listed in Table S2. ICP-AES analysis of **1** reveals that the molar ratio of Cu to Na is 4:1.
